# Supplementary material for: The stereochemistry of two monoterpenoid diastereomers from Ferula dissecta
Source: Royal Society of Chemistry journal article supplement (doi:10.1039/c4ra00547c), 2014-01-01
Supplement: c4ra00547c1.pdf [file c4ra00547c1.pdf]

## Supplementary Informations

# The stereochemistry of two monoterpenoid diastereomers from *Ferula dissecta*

Zhi-Qiang Wang,<sup>a</sup> Chao Huang,<sup>a</sup> Jian Huang,<sup>a,\*</sup> Hong-Ying Han,<sup>b</sup> Guo-Yu Li,<sup>b</sup> Jin-Hui Wang,<sup>a</sup> Tie-Min Sun<sup>a,\*</sup>

\*E-mail:suntiemini@126.com

<sup>a</sup> Key Laboratory of Structure-Based Drug Design and Discovery, Shenyang Pharmaceutical University, Ministry of Education. Shenyang 110016, PR China

<sup>b</sup> School of Pharmacy, Shihezi University, Shihezi 832002, China

### List of supplementary informations

| Contents:                                                                                      | Page: |
|------------------------------------------------------------------------------------------------|-------|
| General experimental procedures                                                                | S2    |
| Fig. S1 CD spectrum of <b>1</b>                                                                | S2    |
| Fig. S2 IR spectrum of <b>1</b>                                                                | S2    |
| Fig. S3 <sup>1</sup> H-NMR spectrum of <b>1</b>                                                | S3    |
| Fig. S4 <sup>13</sup> C-NMR spectrum of <b>1</b>                                               | S3    |
| Fig. S5 HR-EI-MS spectrum of <b>1</b>                                                          | S4    |
| Fig. S6 HMBC spectrum of <b>1</b>                                                              | S4    |
| Fig. S7 NOSEY spectrum of <b>1</b>                                                             | S5    |
| Fig. S8 Enlarged NOSEY spectra of <b>1</b> (part 1)                                            | S6    |
| Fig. S9 Enlarged NOSEY spectra of <b>1</b> (part 2)                                            | S7    |
| Fig. S10 UV of <b>2</b>                                                                        | S8    |
| Fig. S11 CD spectrum of <b>2</b>                                                               | S8    |
| Fig. S12 IR spectrum of <b>2</b>                                                               | S8    |
| Fig. S13 <sup>1</sup> H-NMR spectrum of <b>2</b>                                               | S9    |
| Fig. S14 <sup>13</sup> C-NMR spectrum of <b>2</b>                                              | S9    |
| Fig. S15 HR-EI-MS spectrum of <b>2</b>                                                         | S10   |
| Fig. S16 NOSEY spectrum of <b>2</b>                                                            | S11   |
| Fig. S17 Enlarged NOSEY spectrum of <b>2</b>                                                   | S12   |
| Fig. S18 Enlarged NOSEY spectrum of <b>2</b>                                                   | S13   |
| Fig. S19 CD spectrum of <b>5</b>                                                               | S14   |
| Fig. S20 <sup>1</sup> H-NMR of <b>5</b>                                                        | S14   |
| Fig. S21 CD spectrum of <b>6</b>                                                               | S15   |
| Fig. S22 <sup>1</sup> H-NMR of <b>6</b>                                                        | S15   |
| Fig. S23 Calculated ECD of <b>1</b> and <b>2</b> using different basic sets                    | S16   |
| Fig. S24 The HOMO, LUMO, HOMO-1 and LUMO + 1 orbitals of <b>1</b>                              | S16   |
| Synthesis of <b>5</b> and <b>6</b>                                                             | S16   |
| Cytotoxicity assay and computational details                                                   | S17   |
| Table S1. <sup>1</sup> H NMR, <sup>13</sup> C NMR and NOESY spectral data of compound <b>1</b> | S18   |
| Table S2. <sup>1</sup> H NMR, <sup>13</sup> C NMR and NOESY spectral data of compound <b>2</b> | S19   |

## General experimental procedures

Column chromatography (CC): Silica gel (200–300 mesh; Qingdao Marine Chemical Group, Co.); ODS (30-50  $\mu\text{m}$ ; YMC CO. Ltd. Japan). Preparative HPLC: Waters 600E pump, Waters 2489 UV spectrophotometric detector at 220 nm, Waters Sunfire Prep ODS reversed phase column (10  $\mu\text{m}$ , 10 $\times$ 150 mm, flow rate: 2.0 mL/min); NMR spectra were recorded on Bruker AV-300 spectrometer, TMS as internal standard,  $\delta$  in ppm,  $J$  in Hz; HR-ESI-MS were obtained on Waters LCT Premier XE time-of-flying mass spectrometer; CD spectrum were gotten on Biologic MOS-450 CD spectrometer.

All the chemicals and solvents used in the synthesis were obtained from commercial suppliers. (1*S*, 2*R*, 4*S*)-1,7,7-trimethylbicyclo[2.2.1]heptan-2-ol (**3**) and (1*S*, 2*S*, 4*S*)-1,7,7-trimethylbicyclo[2.2.1]heptan-2-ol (**4**) were obtained from Sigma Chemical (St. Louis, MO, USA). Solvents were dried without further purification except when otherwise noted. Reactions were monitored by TLC, which were visualized by UV inspection and stained with a 10%  $\text{H}_2\text{SO}_4$  solution.

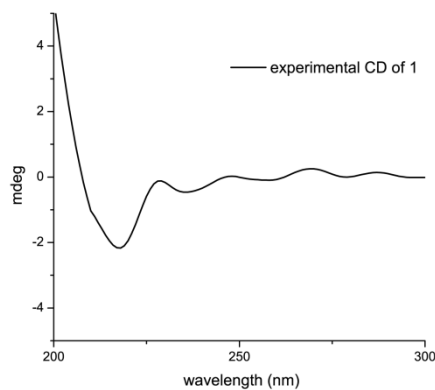

Fig. S1 CD spectrum of 1

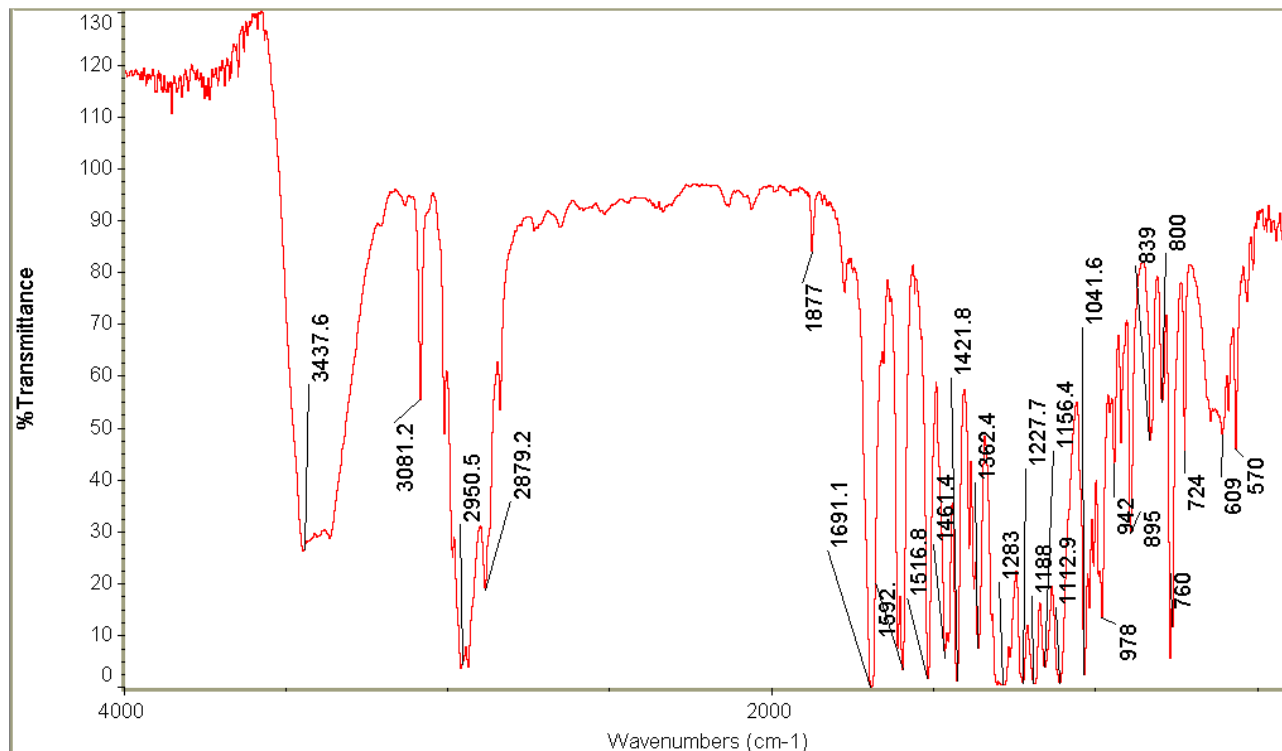

Fig. S2 IR spectra of 1

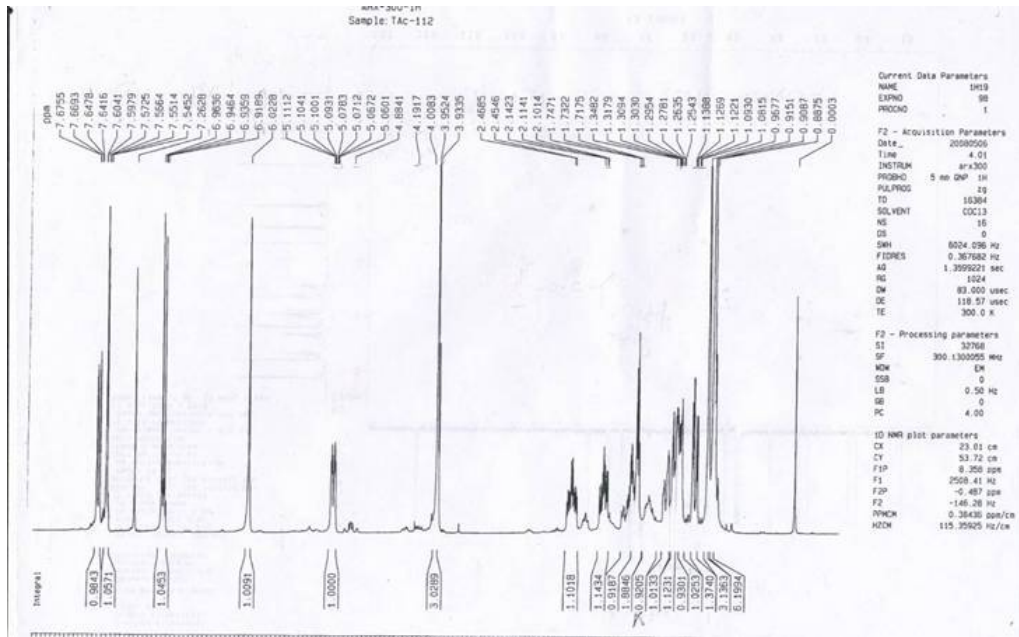

Fig. S3 <sup>1</sup>H-NMR spectrum of 1

AV-600-13C  
 Sample: TAC-112

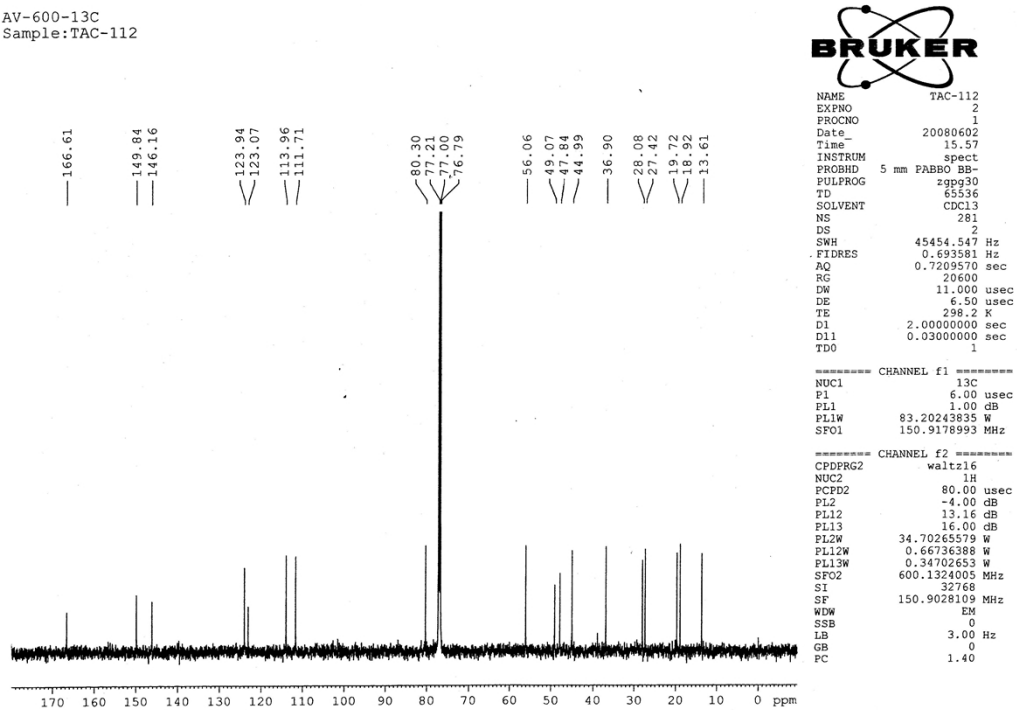

Fig. S4 <sup>13</sup>C-NMR spectrum of 1

Monoisotopic Mass, Even Electron Ions  
 101 formula(e) evaluated with 7 results within limits (all results (up to 1000) for each mass)  
 Elements Used:  
 C: 0-100 H: 0-150 O: 0-40 Na: 0-1  
 TAW-76-5  
 TAW\_20091221\_7 169 (3.819) Cm (169:170-(149:164+176:189))

1: TOF MS ES+  
1.40e+003

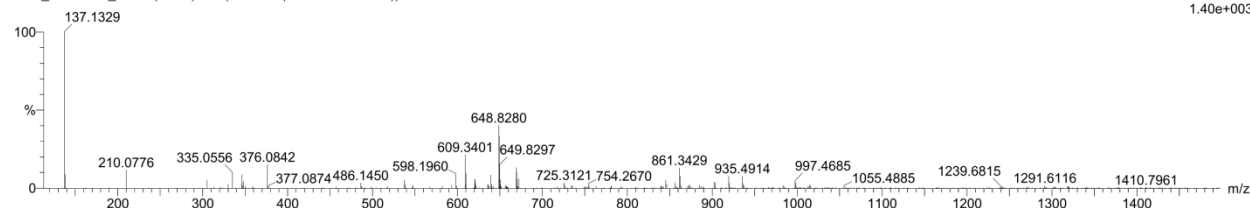

| Mass     | Calc. Mass | mDa   | PPM   | DBE  | i-FIT | Formula       |
|----------|------------|-------|-------|------|-------|---------------|
| 305.1750 | 305.1753   | -0.3  | -1.0  | 6.5  | n/a   | C18 H25 O4    |
|          | 305.1729   | 2.1   | 6.9   | 3.5  | n/a   | C16 H26 O4 Na |
|          | 305.1940   | -19.0 | -62.3 | -1.5 | n/a   | C13 H30 O6 Na |
|          | 305.1600   | 15.0  | 49.2  | 2.5  | n/a   | C14 H25 O7    |
|          | 305.1576   | 17.4  | 57.0  | -0.5 | n/a   | C12 H26 O7 Na |
|          | 305.1905   | -15.5 | -50.8 | 10.5 | n/a   | C22 H25 O     |
|          | 305.1881   | -13.1 | -42.9 | 7.5  | n/a   | C20 H26 O Na  |

Fig. S5 HR-EI-MS spectrum of 1

AV-600-HMBC  
Sample: TAC-112

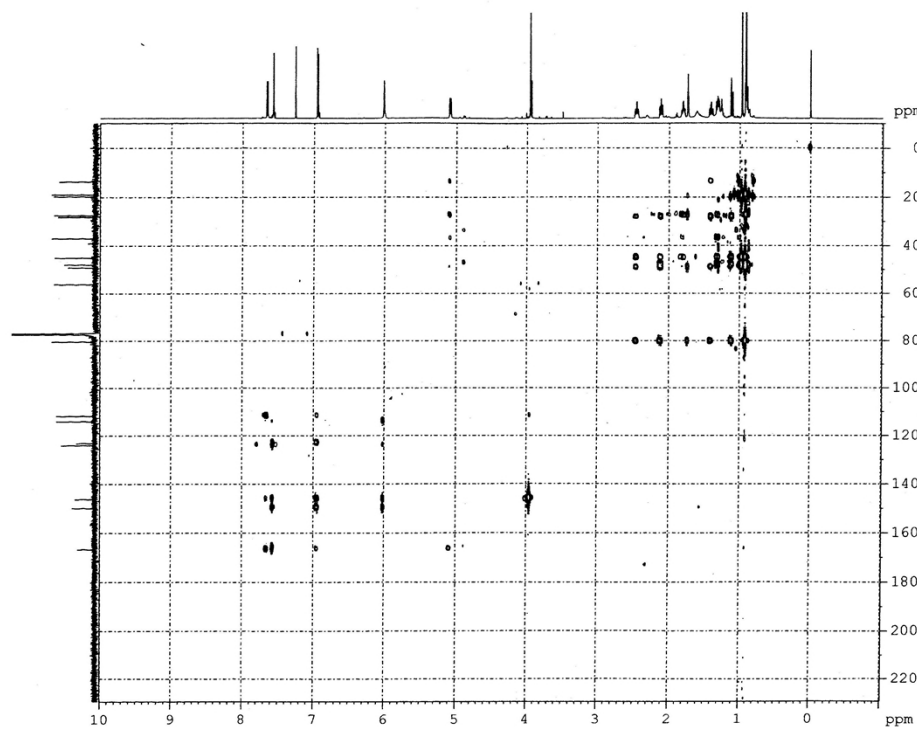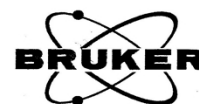

```

NAME          TAC-112
EXPNO         9
PROCNO        1
Date_         20080602
Time         16.03
INSTRUM       spect
PROBHD        5 mm FB80 BB-
PULPROG       hmcgppmgf
TD            2048
SOLVENT       CDCl3
NS            16
DS            16
SWH           6613.757 Hz
FIDRES        3.229573 Hz
AQ            0.1549544 sec
RG            29100
DM            75.600 usec
DE            6.50 usec
TE            296.2 K
CNST2         145.0000000
CNST13        5.0000000
D0            0.0000300 sec
D1            1.5000000 sec
D2            0.00344828 sec
D6            0.1000000 sec
D16           0.0002000 sec
IN0           0.0001380 sec

===== CHANNEL f1 =====
NUC1          13C
P1            11.10 usec
P2            22.20 usec
PL1           4.00 dB
PL1W          34.70265579 W
SFO1          600.1327000 MHz

===== CHANNEL f2 =====
NUC2          13C
P3            8.80 usec
PL2           1.00 dB
PL2W          83.20243835 W
SFO2          150.9194050 MHz

===== GRADIENT CHANNEL =====
GPNAM1        SINE.100
SINE.100
GPNAM2        SINE.100
SINE.100
CP21          30.00 %
GP22          30.00 %
GP23          40.10 %
F16           1000.00 usec
ND0           2
TD            273
SFO1          150.9194 MHz
FIDRES        162.424469 Hz
SW            240.000 ppm
FVMODE        CF
SI            1024
SF            600.1300036 MHz
SINE
SSB           0
LB            0.00 Hz
GB            0
PC            1.40
SI            1024
MC2           CF
SF            150.9028509 MHz
SINE
SSB           0
LB            0.00 Hz
GB            0
  
```

Fig. S6 HMBC spectrum of 1

AV-600-NOESY  
 Sample: TAC-112

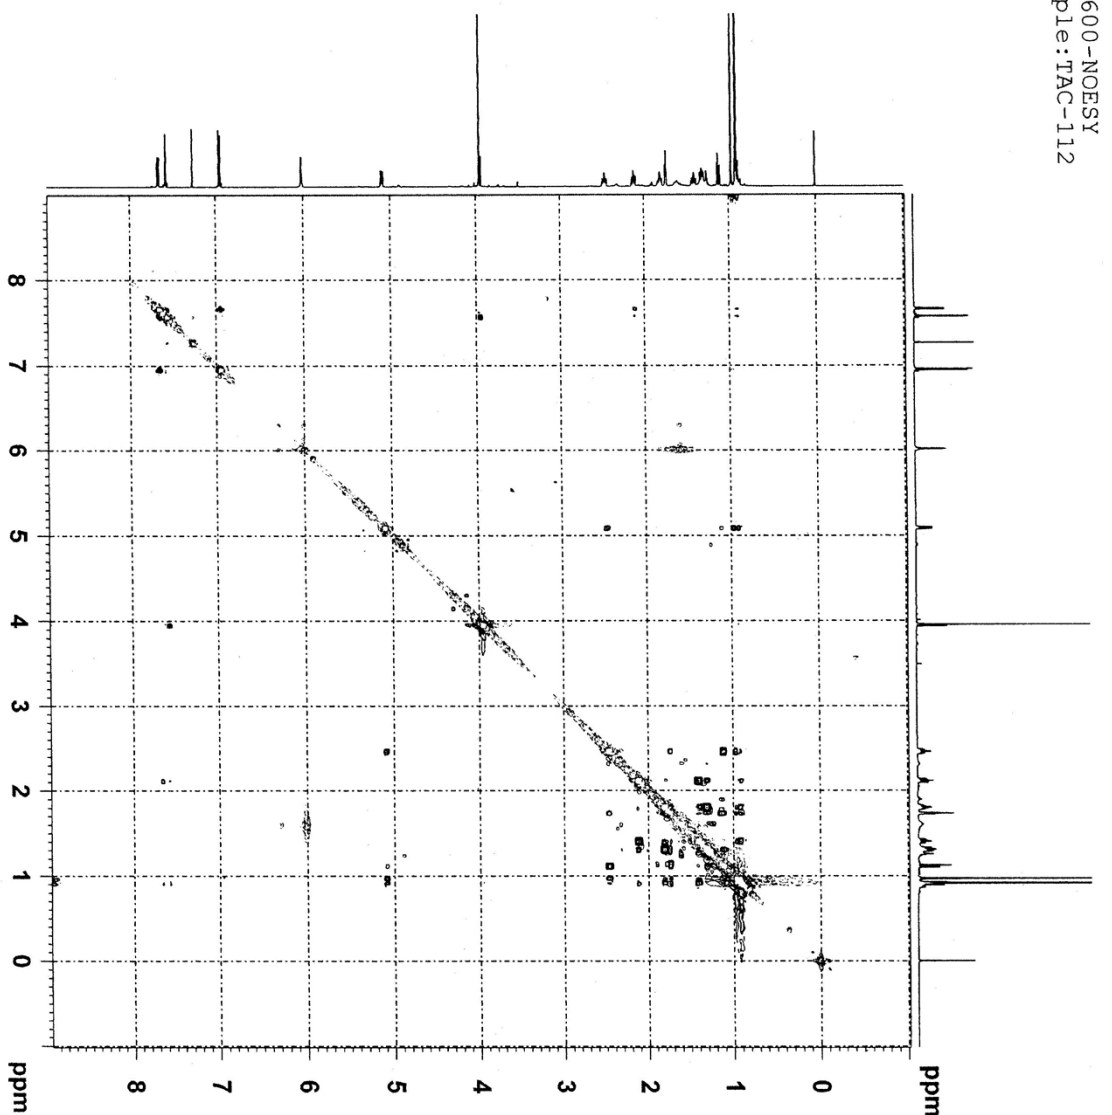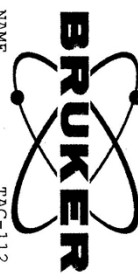

```

NAME          TAC-112
EXPNO         6
PROCNO        1
Date_         20080623
Time          12.12
INSTRUM       spect
PROBHD        5 mm PABBO BB-
PULPROG       noesyph
TD            1024
SOLVENT       CDCl3
NS            4
DS            4
SMH           6009.615 Hz
FIDRES        5.868765 Hz
AQ            0.0853300 sec
RG            456
DW            83.200 usec
DE            6.50 usec
TE            296.4 K
D0            0.00006907 sec
D1            2.00000000 sec
D8            0.60000002 sec
INO           0.00016640 sec

===== CHANNEL f1 =====
NUC1          1H
P1            11.10 usec
PL1           -4.00 dB
PL1W         34.70265579 W
SFO1         600.1324005 MHz
NDO           1
TD           256
SFO1         600.1324 MHz
FIDRES       23.475023 Hz
SW           10.014 ppm
FnMODE       States--TPPI
SI           1024
SF           600.1300072 MHz
WDW          QSINE
SSB          2
LB           0.00 Hz
GB           0
PC           1.00
SI           1024
MC2          States--TPPI
SF           600.1300057 MHz
WDW          QSINE
SSB          2
LB           0.00 Hz
GB           0
  
```

Fig. S7. NOSEY spectrum of 1

AV-600-NOESY  
Sample: TAC-112

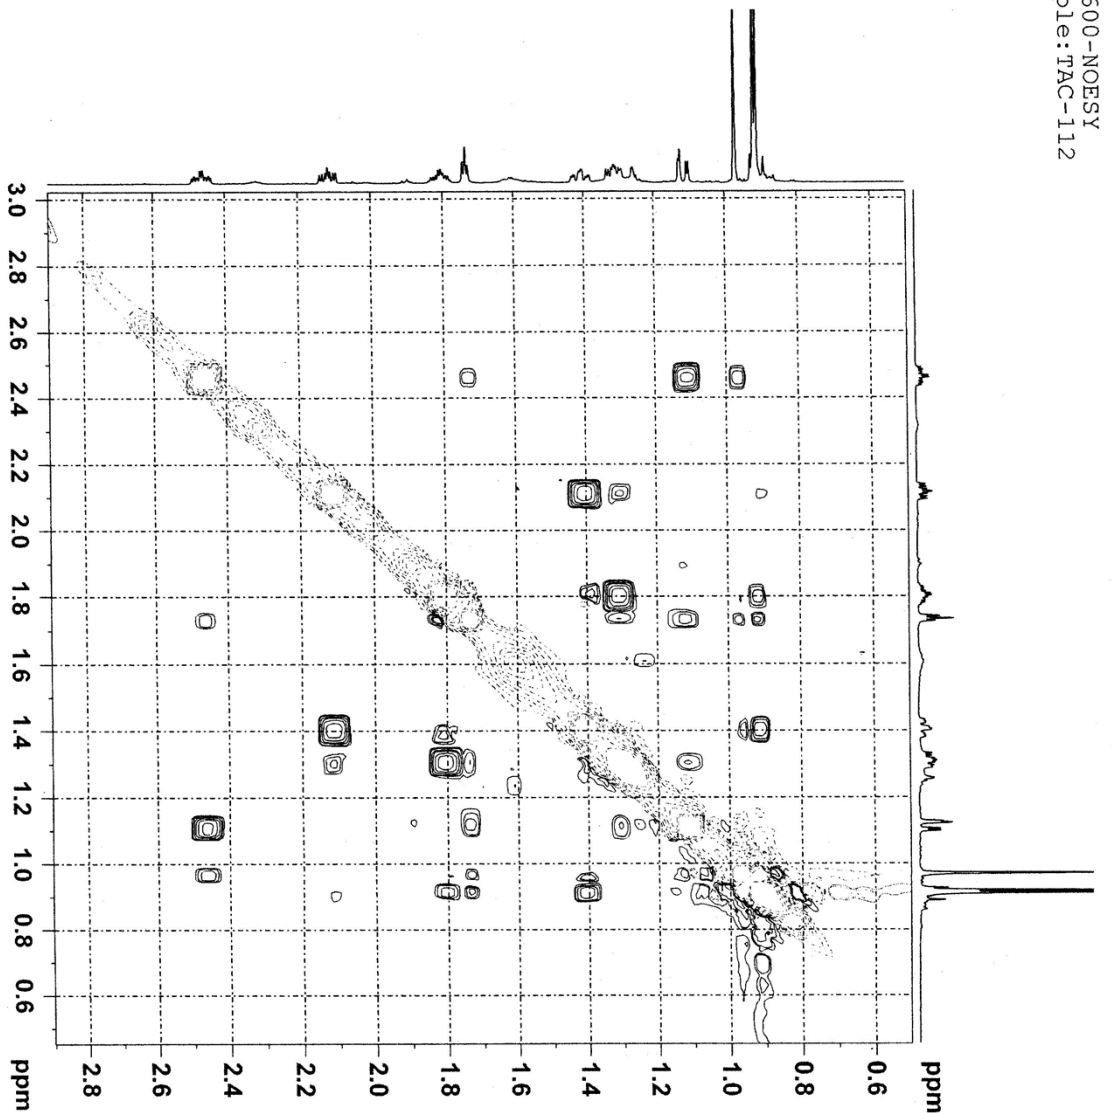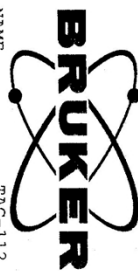

```

NAME TAC-112
EXPNO 6
PROCNO 1
Date_ 20080623
Time 12.12
INSTRUM spect
PROBHD 5 mm PABBO BB-
PULPROG noesyph
TD 1024
SOLVENT CDCl3
NS 4
DS 4
SWH 6009.615 Hz
FIDRES 5.868763 Hz
AQ 0.0853300 sec
RG 456
DM 83.200 usec
DE 6.50 usec
TE 296.4 K
D0 0.00006907 sec
D1 2.00000000 sec
D8 0.60000002 sec
IN0 0.00016640 sec

===== CHANNEL f1 =====
NUC1 1H
P1 11.10 usec
PL1 -4.00 dB
PL1W 34.70265579 W
SFO1 600.1324005 MHz
NDO 1
TD 256
SFO1 600.1324 MHz
FIDRES 23.475023 Hz
SW 10.014 ppm
FnmODE States--fppi
SI 1024
SF 600.1300072 MHz
WDW QSINE
SSB 2
LB 0.00 Hz
GB 0
PC 1.00
SI 1024
MC2 States--fppi
SF 600.1300057 MHz
WDW QSINE
SSB 2
LB 0.00 Hz
GB 0
  
```

Fig. S8 Enlarged NOSEY of 1 (part 1)

AV-600-NOESY  
 Sample: TAC-112

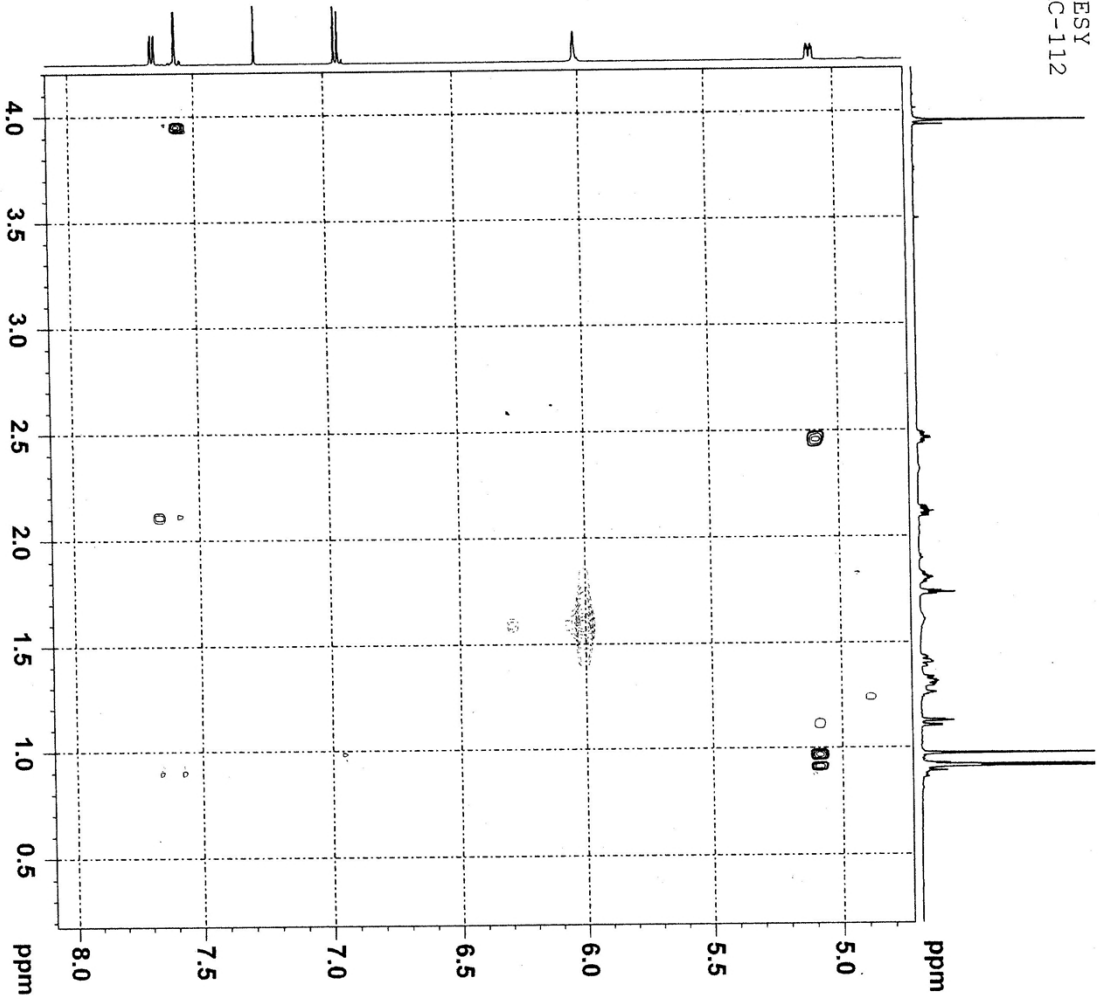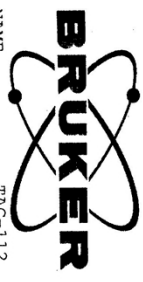

```

NAME TRC-112
EXNO 6
PROCNO 1
Date_ 20080623
Time_ 12.12
INSTRUM 5 mm PABBO BB-
PROBHD noesyph
PULPROG 1024
TD CDCl3
SOLVENT 4
NS 4
DS 4
SWH 6009.615 Hz
FIDRES 5.868765 Hz
AQ 0.0853300 sec
RG 456
RG 83.200 usec
DE 6.50 usec
TE 296.4 K
D0 0.00006907 sec
D1 2.00000000 sec
D8 0.60000002 sec
INO 0.00016640 sec

===== CHANNEL f1 =====
NUC1 1H
P1 11.10 usec
PL1 -4.00 dB
PL1W 34.70265579 W
SFO1 600.1324005 MHz
NDO 1
TD 256
SFO1 600.1324 MHz
FIDRES 23.475023 Hz
SW 10.014 ppm
FnMODE States-TpPI
SI 1024
SF 600.1300072 MHz
WDW QSINE
SSB 2
LB 0.00 Hz
GB 0
PC 1.00
SI 1024
MC2 States-TpPI
SF 600.1300057 MHz
WDW QSINE
SSB 2
LB 0.00 Hz
GB 0
  
```

Fig. S9 Enlarged NOSEY of 1 (part 2)

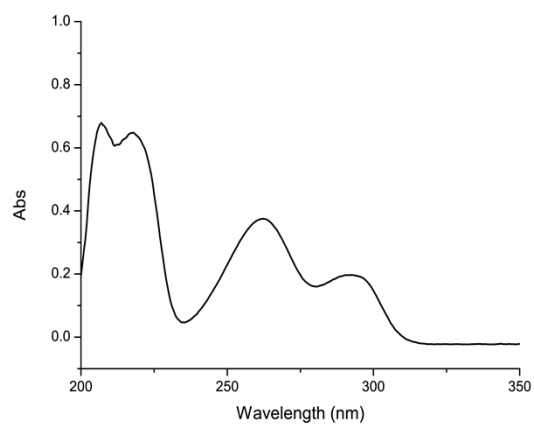

Fig. S10 UV of 2

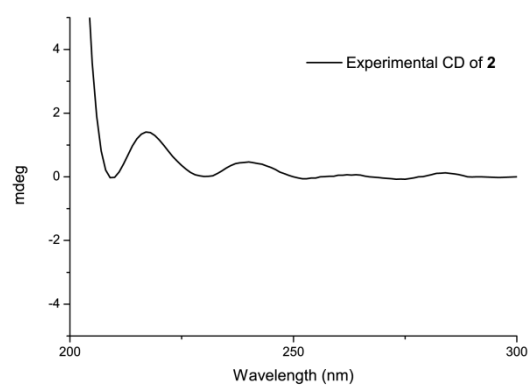

Fig. S11 CD of 2

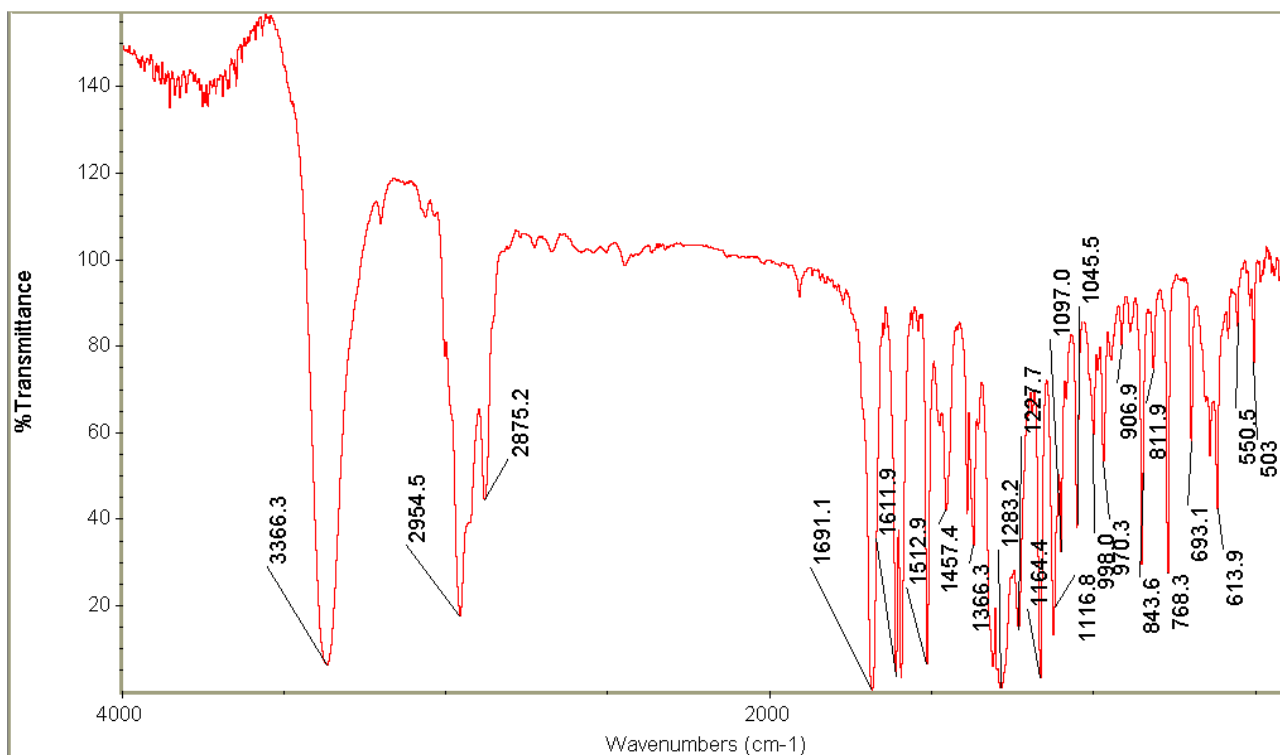

Fig. S12 IR spectrum of 2



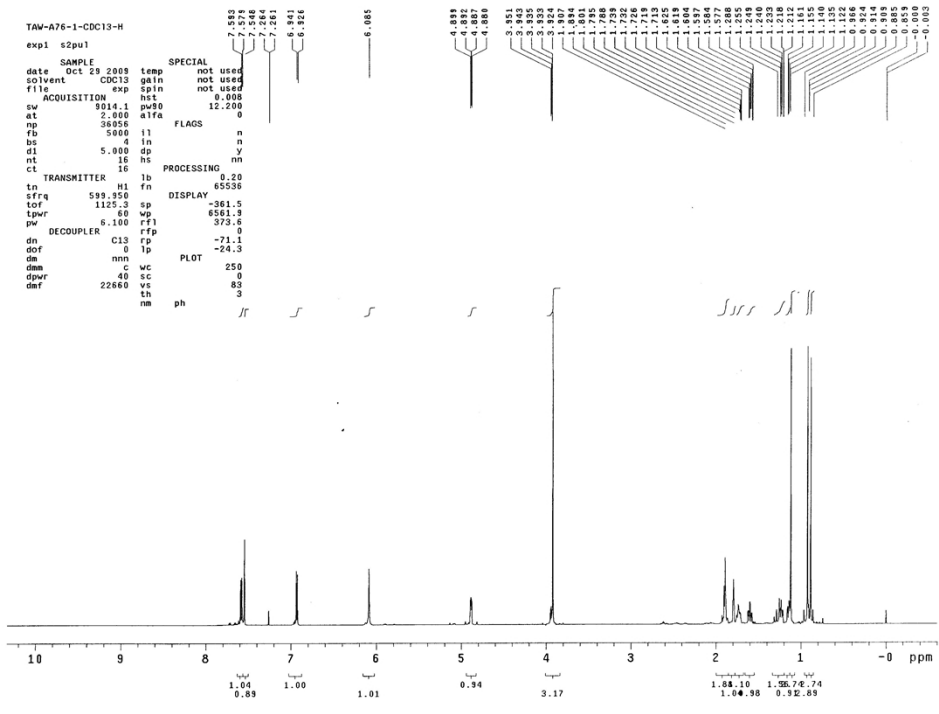

Fig. S13 <sup>1</sup>H-NMR of 2

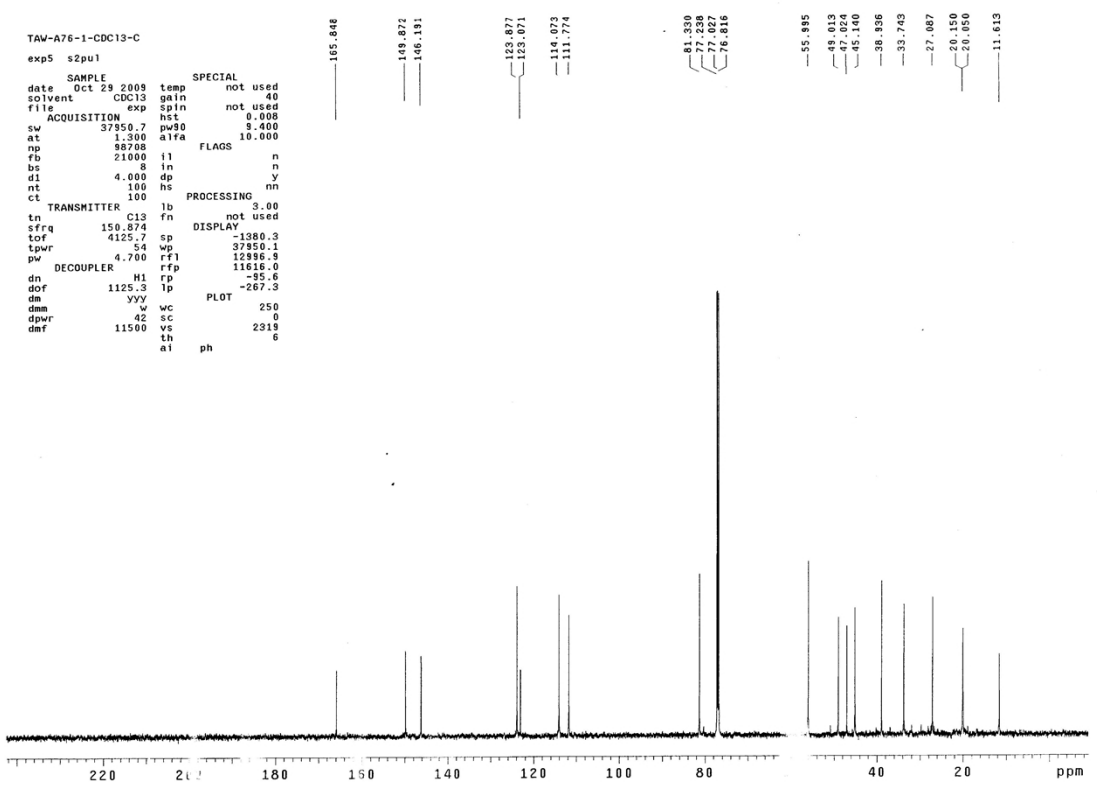

Fig. S14 <sup>13</sup>C-NMR of 2

Monoisotopic Mass, Even Electron Ions  
 178 formula(e) evaluated with 7 results within limits (all results (up to 1000) for each mass)  
 Elements Used:  
 C: 0-100 H: 0-150 O: 0-40  
 TAW-76-1  
 TAW\_20091221\_6 168 (3.774) Cm (167:170-(149:162+180:192))

1: TOF MS ES+  
2.78e+003

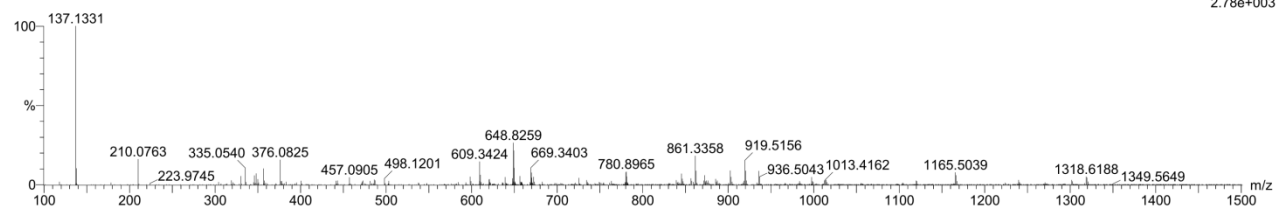

| Mass     | Calc. Mass | mDa   | PPM   | DBE  | i-FIT | Formula     |
|----------|------------|-------|-------|------|-------|-------------|
| 609.3424 | 609.3427   | -0.3  | -0.5  | 12.5 | 6.6   | C36 H49 O8  |
|          | 609.3275   | 14.9  | 24.5  | 8.5  | 7.5   | C32 H49 O11 |
|          | 609.3369   | 5.5   | 9.0   | 21.5 | 7.8   | C43 H45 O3  |
|          | 609.3580   | -15.6 | -25.6 | 16.5 | 9.4   | C40 H49 O5  |
|          | 609.3486   | -6.2  | -10.2 | 3.5  | 10.5  | C29 H53 O13 |
|          | 609.3521   | -9.7  | -15.9 | 25.5 | 12.2  | C47 H45     |
|          | 609.3334   | 9.0   | 14.8  | -0.5 | 13.8  | C25 H53 O16 |

Fig. S15 HR-EI-MS spectrum of 2

AV-600-NOESY  
 Sample:TAC-93

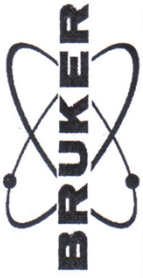

TAC-93  
 NAME  
 EXPNO 6  
 PROCNO 1  
 Date\_ 20080625  
 Time\_ 12.45  
 INSTRUM spect  
 PROBD 5 mm PABBO BB-  
 PULPROG noesyph  
 TD 1024  
 SOLVENT CDCl3  
 NS 4  
 DS 4  
 SWH 6009.615 Hz  
 FIDRES 5.868765 Hz  
 AQ 0.0853300 sec  
 RG 576  
 DW 83.200 usec  
 DE 6.50 usec  
 TE 296.2 K  
 D0 0.00006907 sec  
 D1 2.00000000 sec  
 D8 0.60000002 sec  
 INO 0.00016640 sec

==== CHANNEL f1 =====  
 NUC1 1H  
 P1 11.10 usec  
 PL1 -4.00 dB  
 PLLW 34.70265579 W  
 SFO1 600.1324005 MHz  
 TD 1  
 ND0 256  
 SFO1 600.1324 MHz  
 FIDRES 23.475023 Hz  
 SW 10.014 ppm  
 FMODE States-TPPI  
 SI 1024  
 SF 600.1300072 MHz  
 WDW QSINE  
 SSB 2  
 LB 0.00 Hz  
 GB 0  
 PC 1.00  
 SI 1024  
 MC2 States-TPPI  
 SF 600.1300057 MHz  
 WDW QSINE  
 SSB 2  
 LB 0.00 Hz  
 GB 0

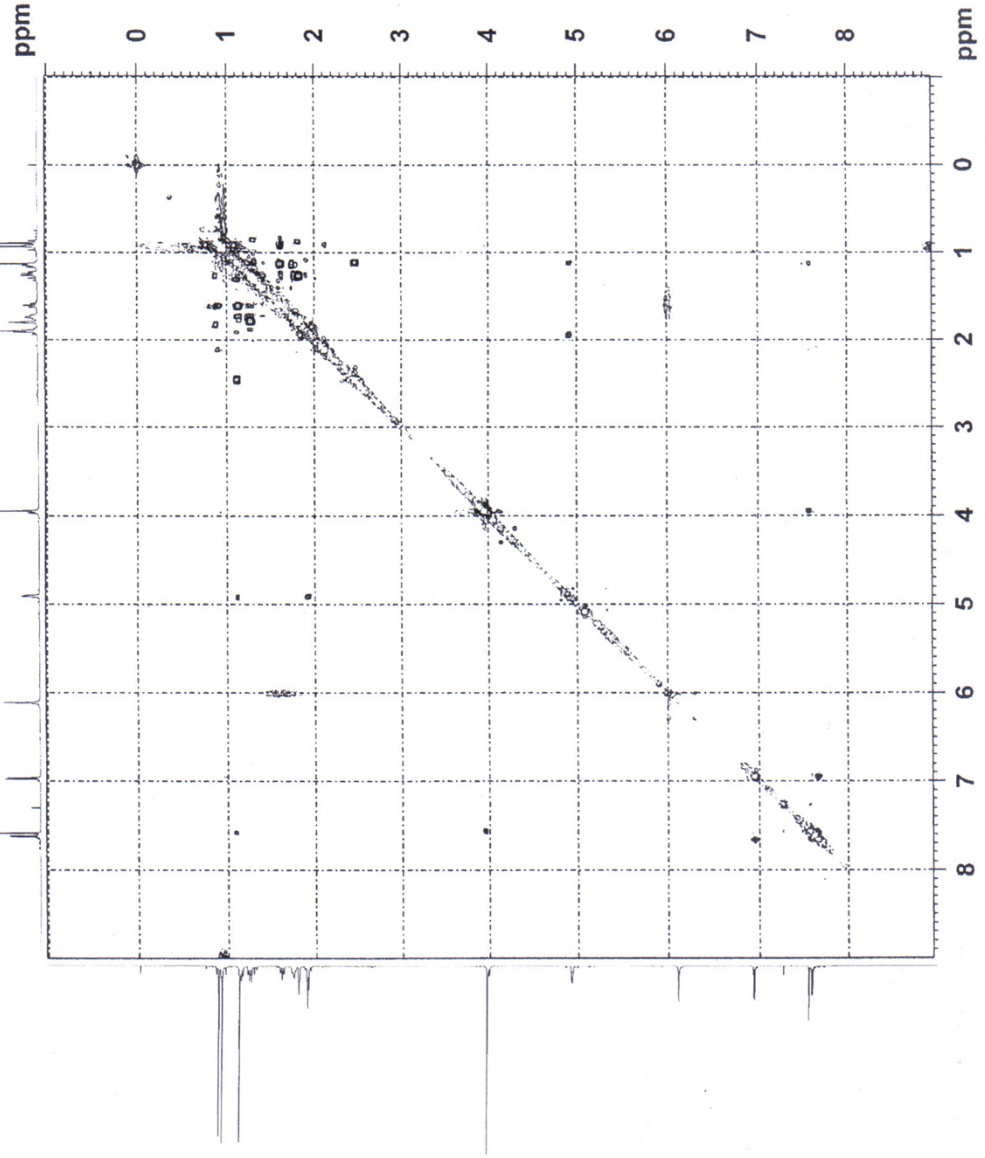

Fig.16 NOSEY spectrum of 2.

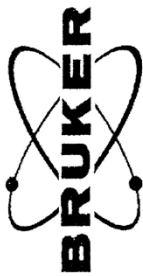

NAME TAC-93  
 EXPNO 6  
 PROCNO 1  
 Date\_ 20080625  
 Time\_ 12.45  
 INSTRUM spect  
 PROBHD 5 mm PABBO BB-  
 PULPROG noesyph  
 TD 1024  
 SOLVENT CDC13  
 NS 4  
 DS 4  
 GWH 6009.515 Hz  
 F1F2 5.868765 Hz  
 AQ 0.0853300 sec  
 RG 576  
 DW 83.200 usec  
 DE 6.53 usec  
 TE 296.2 K  
 D0 0.00006907 sec  
 D1 2.00000000 sec  
 D8 0.60000000 sec  
 TNO 0.00016640 sec

CHANNEL f1 600.1324005 MHz  
 NUC1 1H  
 P1 11.10 usec  
 PL1 4.00 dB  
 PL12 34.70265736 dB  
 SECT 600.1324005 MHz  
 NUC 1  
 TD 256  
 F2 600.1324 MHz  
 F1F2 23.475023 Hz  
 CW 10.014 ppm  
 States fF1 1024  
 SF 600.1300072 MHz  
 QSI 2  
 WDW 0.00 Hz  
 SSB 0  
 GB 0  
 PC 1.00  
 SI 1024  
 MC2  
 States-TRF 600.1300057 MHz  
 WDW 2  
 SSB 0  
 GB 0  
 PC 1.00 Hz

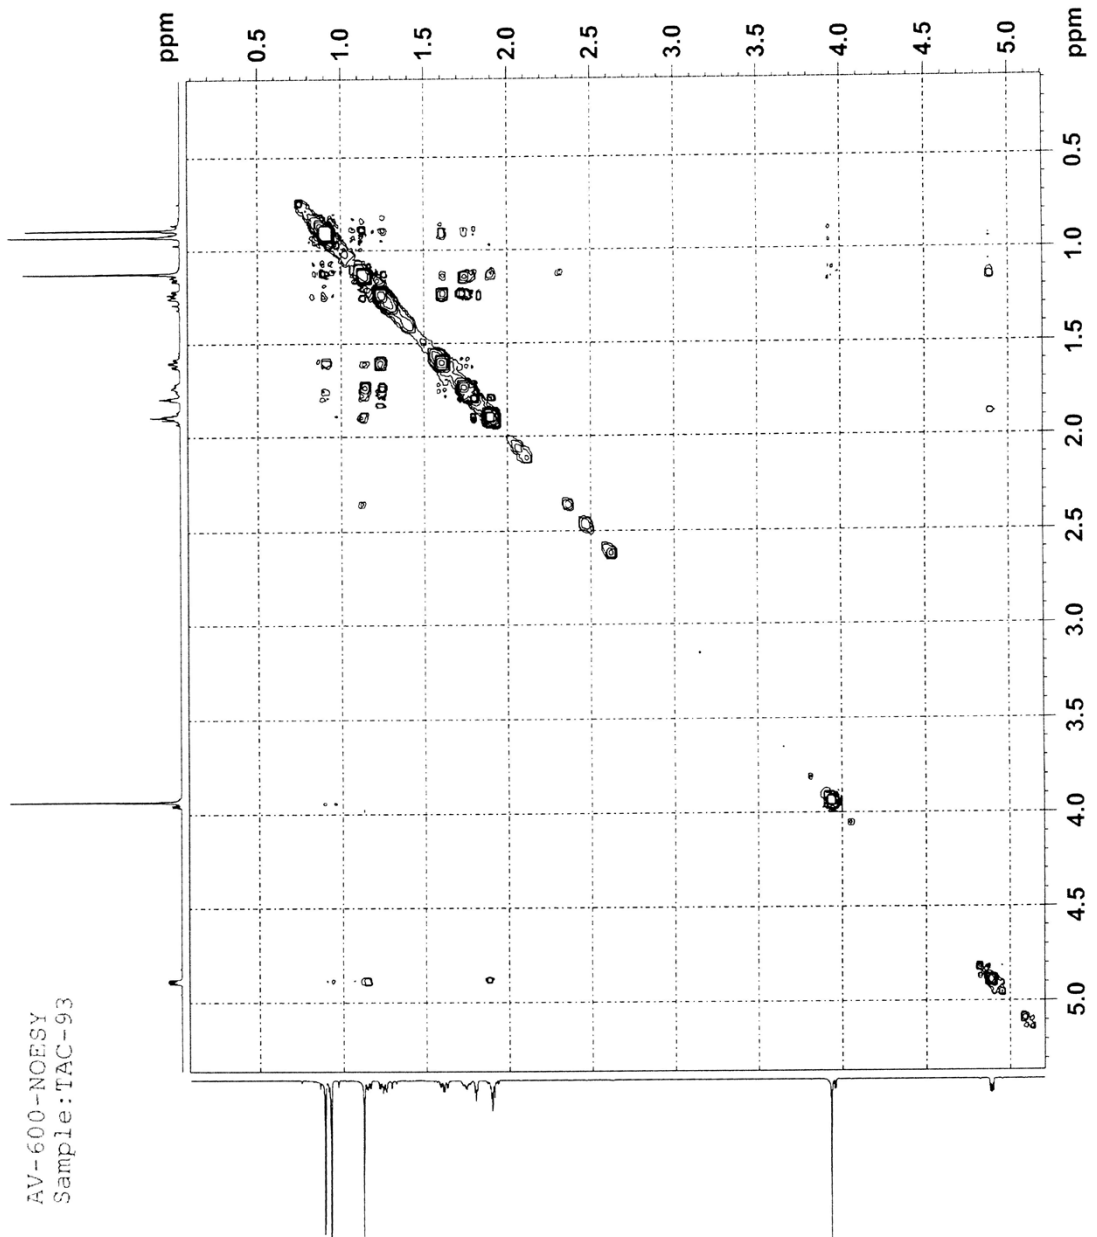

AV-600-NOESY  
 Sample: TAC-93

Fig.17 Enlarged NOESY spectrum of 2.

AV-600-NOESY  
Sample: TAC-93

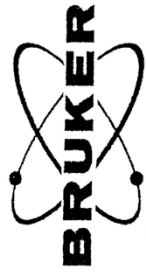

NAME TAC-93  
 EXPNO 6  
 PROCNO 1  
 Date\_ 20080625  
 Time\_ 12.45  
 INSTRUM spect  
 PROBRD 5 mm PABBO BB-  
 PULPROG noesy3D  
 TD 1024  
 SOLVENT CDCl3  
 NS 4  
 DS 4  
 SWH 6009.615 Hz  
 FIDRES 5.868765 Hz  
 AQ 0.0853300 sec  
 RG 576  
 DW 83.200 usec  
 DE 6.50 usec  
 TE 296.2 K  
 D0 0.0000000 sec  
 D1 2.0000000 sec  
 D8 0.6000000 sec  
 IN0 0.0001640 sec

===== CHANNEL f1 =====  
 NUC1 1H  
 P1 11.10 usec  
 PL1 -4.00 dB  
 PL1W 34.70285579 W  
 SF01 600.1304005 MHz  
 ND0 1  
 TD 256  
 SF01 600.1324 MHz  
 FIDRES 23.475023 Hz  
 SW 10.014 ppm  
 PRMODE States-TPI  
 SI 1024  
 SF 600.1300072 MHz  
 WDW QSI  
 SSB 2  
 LB 0.00 Hz  
 GR 0  
 PC 1.00  
 SI 1024  
 MC7 States-TPI  
 SF 600.1300057 MHz  
 WDW QSI  
 SSB 2  
 LB 0.00 Hz  
 GB 0

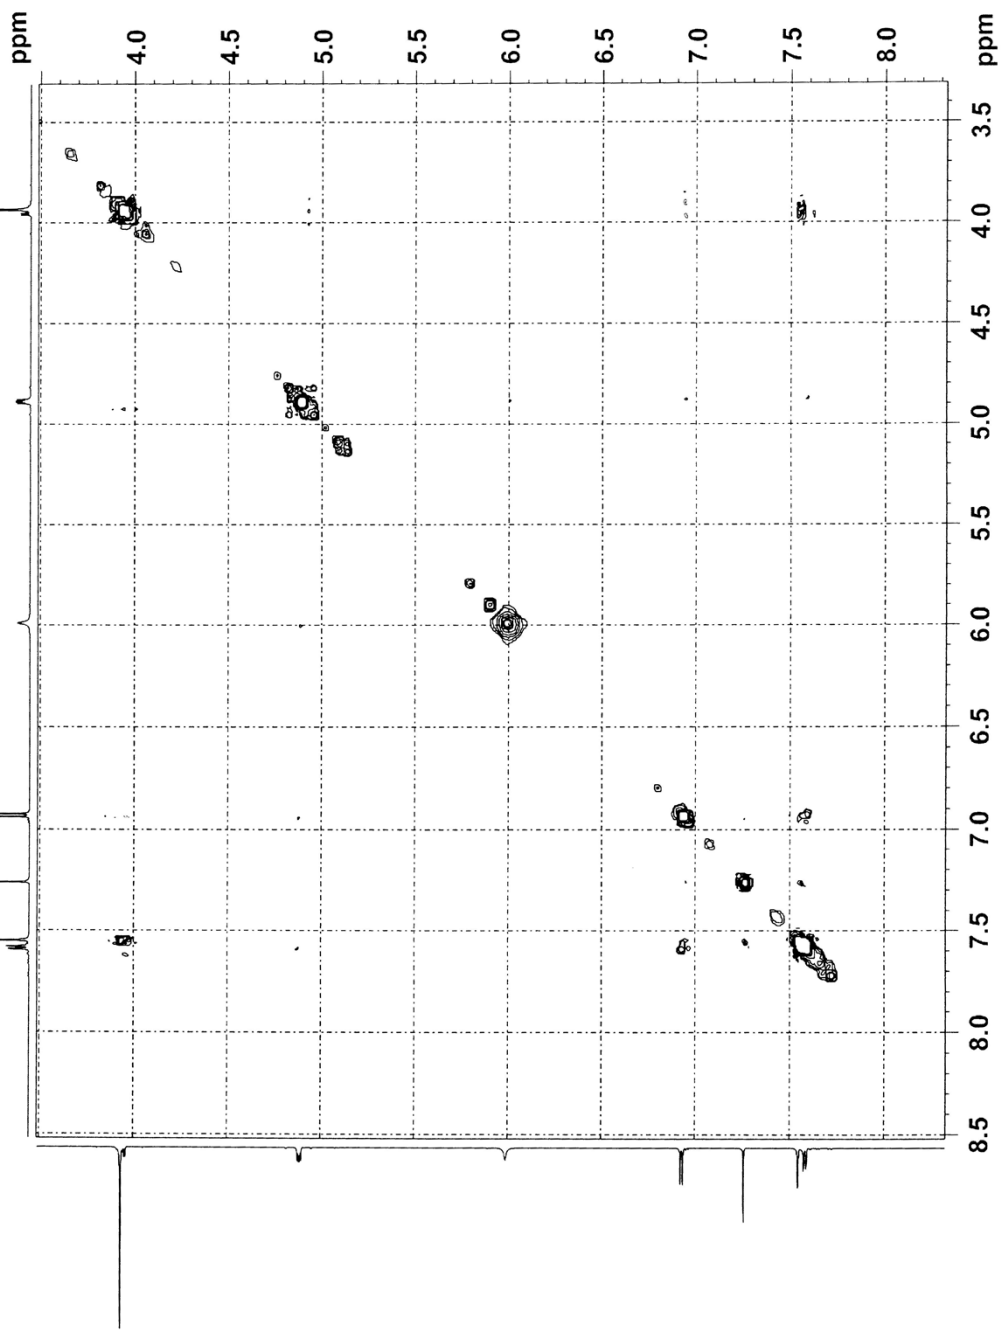

Fig.18 Enlarged NOSEY spectrum of 2.

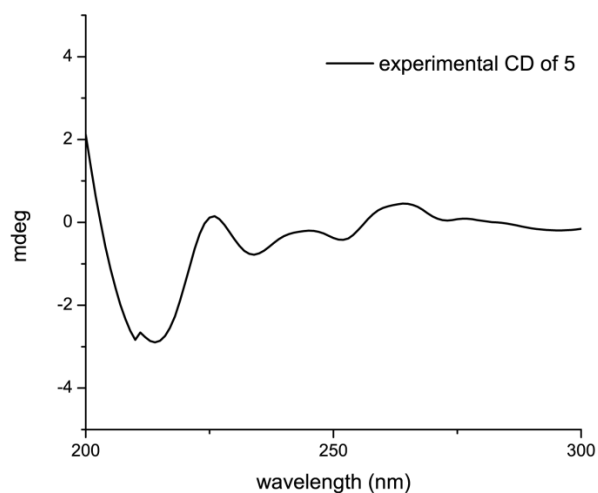

Fig. S19 CD spectrum of 5

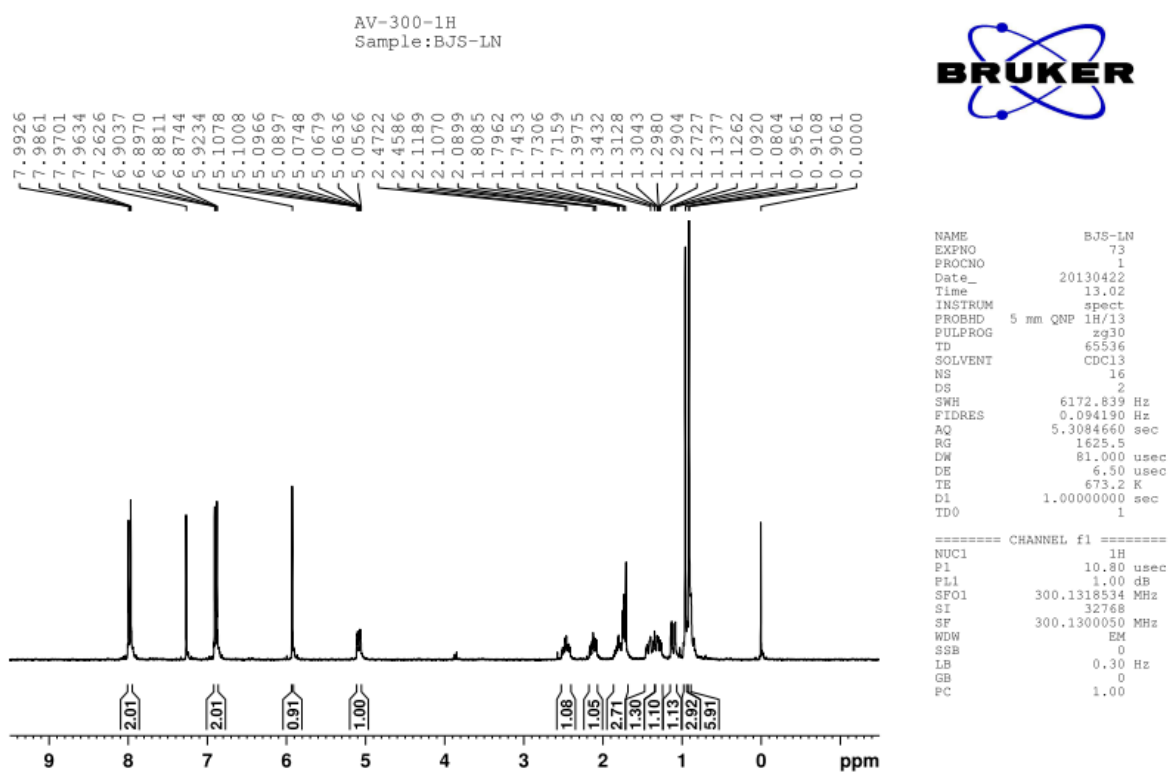

Fig. S20 <sup>1</sup>H-NMR of 5

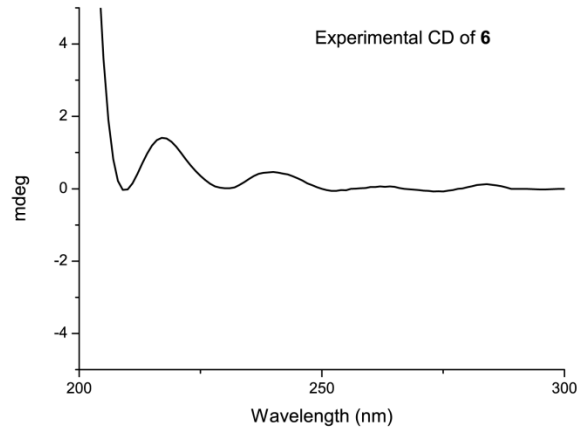

Fig. S 21 CD spectrum of 6

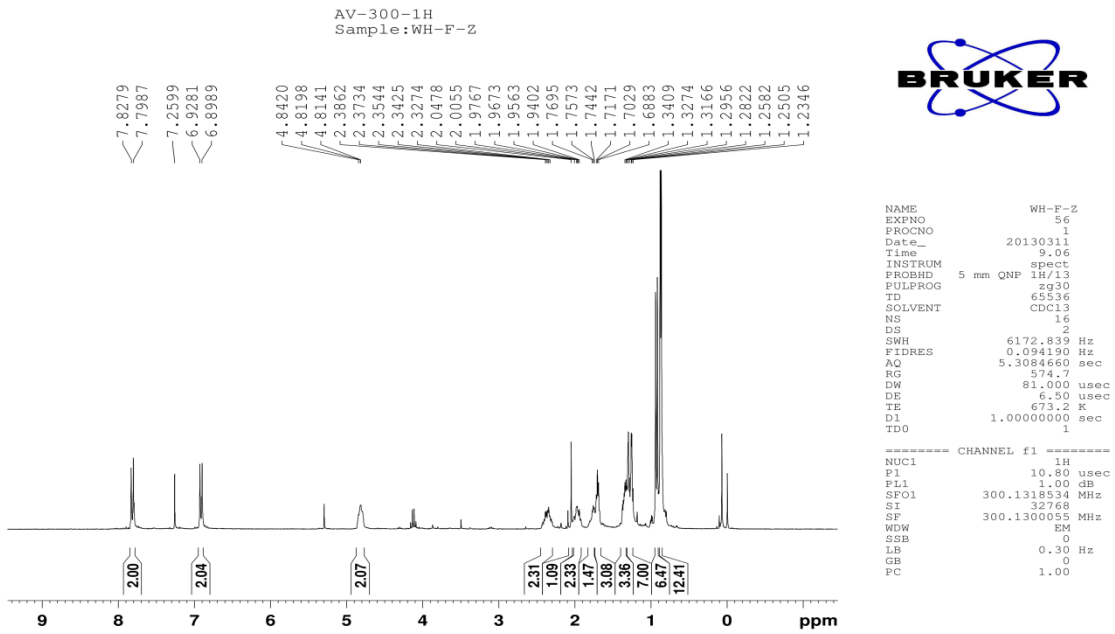

Fig. S 22 <sup>1</sup>H-NMR of 6

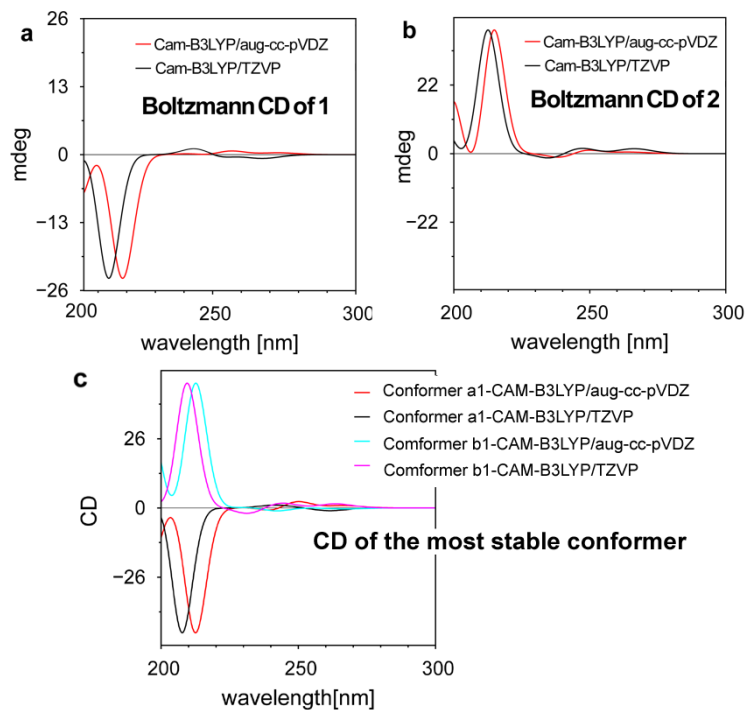

Fig. S23 Calculated ECDs of **1** and **2** using different basic sets

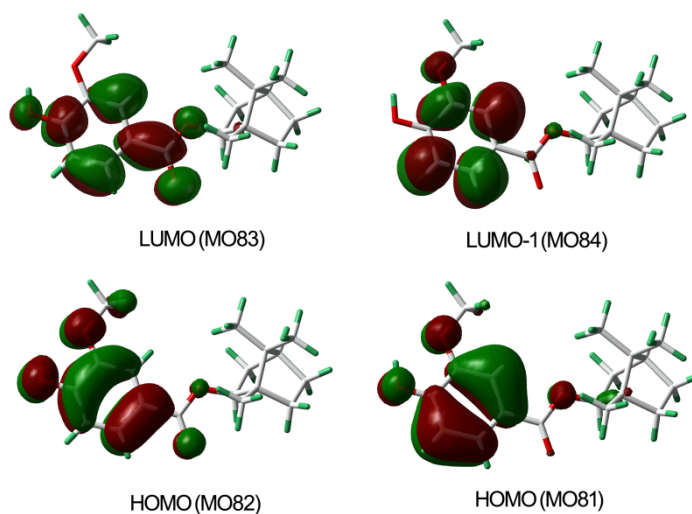

Fig. S24. The HOMO, LUMO, HOMO-1 and LUMO+1 orbitals of **1** generated by GaussView 5.0.8 program.

### Synthesis of **5** and **6**

A solution of (1*S*,2*R*,4*S*)-1,7,7-trimethylbicyclo[2.2.1]heptan-2-ol (0.23 g, 1.5 mmol) and DBU (0.49 g, 3 mmol) in dried  $\text{CH}_2\text{Cl}_2$  were stirred at 0 °C for 30 min before added to 4-methoxybenzoyl chloride (0.51 g, 3 mmol). The reaction mixture was then stirred at 0 °C for 1 h., acidified to pH 3-4 with 1 M HCl and extracted with  $\text{CH}_2\text{Cl}_2$ . The organic layer was washed with brine, dried over sodium sulfate, filtered and evaporated under reduced pressure. The crude product was purified by silica gel chromatography to



afford compound **5** as a white solid (0.33 g, 75.5%). The compound **6** (0.35 g, 80.1%) was synthesized with (1*S*,2*S*,4*S*)-1,7,7-trimethylbicyclo[2.2.1]heptan-2-ol (0.23 g, 1.5 mmol) through the same process as the compound **5**

Compound **5**: White grease; <sup>1</sup>H NMR (300 MHz, CDCl<sub>3</sub>): δ<sub>H</sub> 8.00 (2H, d, J = 9.0 Hz, H-3', H-7'), 6.92 (2H, d, J = 9.0 Hz, H-4', H-6'), 5.09 (1H, br d, J = 9.2 Hz, H-2), 3.86 (3H, s, 5'-OCH<sub>3</sub>), 2.47 (1H, ddd, J = 14.1, 9.2 and 4.2 Hz, H-3β), 2.12 (1H, ddd, J = 12.8, 9.0, 4.2 Hz, H-6β), 1.78 (1H, ddt, J = 13.9, 9.0, 4.2 Hz, H-5β), 1.74 (1H, t, J = 4.2 Hz, H-4), 1.41 (1H, ddd, J = 12.8, 10.2, 4.2 Hz, H-6α), 1.30 (1H, ddd, J = 13.9, 10.2, 4.2 Hz, H-5α), 1.12 (1H, dd, J = 14.1, 4.2 Hz, H-3α), 0.96 (3H, s, H-10), 0.91 (3H, s, H-9), 0.90 (3H, s, H-8). Compound **6**: White grease; <sup>1</sup>H NMR (300 MHz, CDCl<sub>3</sub>): δ<sub>H</sub> 7.93 (2H, d, J = 8.4 Hz, H-3', H-7'), 6.88 (2H, d, J = 8.4 Hz, H-4', H-6'), 4.88 (1H, dd, J = 6.4 and 4.6 Hz, H-2), 3.84 (3H, s, 5'-OCH<sub>3</sub>), 1.91 (1H, dd, J = 13.2, 4.2 Hz, H-3β), 1.89 (1H, dd, J = 13.2, 4.6 Hz, H-3α), 1.80 (1H, dq, J = 12.9, 4.2 Hz, H-5β), 1.74 (1H, br t, J = 4.2 Hz, H-4), 1.60 (1H, td, J = 13.8, 4.2 Hz, H-6β), 1.32 (1H, ddd, J = 12.9, 9.2, 4.2 Hz, H-5α), 1.13 (1H, dd, J = 13.8, 9.2 Hz, H-6α), 1.11 (3H, s, H-10), 0.92 (3H, s, H-8), 0.88 (3H, s, H-9).

## Cytotoxicity Assay

The human cervical cancer HeLa cell line was purchased from American Type Culture Collection (#HB-8065, ATCC, Manassas, VA, USA). The cells were cultured in RPMI 1640 medium supplemented with 10 % FCS and 0.03 % L-glutamine (Gibco), and maintained at 37 °C with 5 % CO<sub>2</sub> in a humidified atmosphere.

HeLa cells were incubated in 96-well plates (NUNC, Roskilde, Denmark) at a seeding density of 1 × 10<sup>5</sup> cells per well. The cells were incubated with the test compounds of different concentrations. Four hours before the end of incubation, 20 μL 3-(4,5-Dimethylthiazol-2-yl)-2,5-diphenyltetrazolium bromide (MTT, Sigma, St. Louis, MO, USA) solution (5.0 mg/L) was added to each well. The resulting crystals were dissolved in 100 μL DMSO. Absorbance was measured with a microplate reader (TECAN SPECTRA, Wetzlar, Germany). The cytotoxic effect was expressed as the relative percentage of cell growth inhibition as calculated below:

$$\text{Cell growth inhibition (\%)} = [A_{570}(\text{control}) - A_{570}(\text{compound})] / [A_{570}(\text{control}) - A_{570}(\text{blank})] \times 100$$

## Computational details

The conformational search were performed using the Spartan 08 program with the MMFF94 molecular mechanics force field. Then all of the possible conformers were optimized at B3LYP level of theory using 6-311++G (d, p) and B3LYP/TZVP basis sets. Frequency calculations based on previously optimized geometries were performed in order to ensure the minimum energy of the structure. Relative population of each conformer was valued on the basis of Boltzmann weighting factor at 298 K.

After that the ab initio GIAO (gauge including atomic orbital) NMR chemical shift values were calculated at the level of B3LYP/6-311++G (d, p) using the Gaussian 09 software package. The theoretical chemical shifts were obtained by the equation:

$$\delta_{isoX} = \sigma_{isoTMSX} - \sigma_{isoX} \quad (\text{Eq.1})$$

where δ<sub>isoX</sub> is the isotropic chemical shift, σ<sub>isoTMSX</sub> is the absolute shielding of the standard (in this case, TMS), σ is the absolute shielding of our compounds. The calculated average value for <sup>13</sup>C isotropic magnetic shielding of TMS is 184.03 ppm and 31.97 ppm for <sup>1</sup>H.

Theoretical isotropic chemical shift depends on the Boltzmann distribution of each conformation:

$$\delta_{isoX}^{total} = \sum_{i=1}^n P_i \delta_{isoX_i} \quad (\text{Eq.2})$$

Where  $\delta_{isoXi}$  is the isotropic chemical shift of *i*th conformer,  $P_i$  is Boltzmann weighting factor of *i*th conformer,  $\delta_{isoX}^{total}$  is the isotropic chemical shift.

Then the theoretical chemical shifts are empirically scaled according to the following equation:

$$\delta_{scaled} = \frac{\delta_{calc} - intercept}{slope} \quad (Eq.3)$$

Where slope and intercept are obtained from a plot of the calculated data against the experimental data to be assigned; the purpose of this approach is to remove systematic errors in the shift calculation. The correlation coefficients were calculated between the scaled theoretical chemical shifts and experimental chemical shifts.

The geometries used for the ECD calculation are optimized by DFT calculations at the B3LYP/TZVP levels. The ECD were then simulated by the time-dependent density functional theory (TDDFT) method at the level of CAM-B3LYP/TZVP. ECD curves were generated by Specdis using half bandwidth of 0.2 eV. To generate the final spectrum of ECD, all the simulated spectra of the lowest energy conformations were averaged according to the Boltzmann distribution theory in which their Gibbs free energy (G) was adopted.

Table S1. <sup>1</sup>H NMR, <sup>13</sup>C NMR and NOESY spectral data of compound **1** (CDCl<sub>3</sub>) (<sup>1</sup>H: 300 MHz, <sup>13</sup>C: 75 MHz,  $\delta$ : ppm, *J*: Hz)

| Position             | $\delta$ (H) ( <i>J</i> in Hz)            | $\delta$ (C) | NOESY                   |
|----------------------|-------------------------------------------|--------------|-------------------------|
| 1                    |                                           | 49.1         |                         |
| 2                    | 5.08 (1H, br d, <i>J</i> =9.6)            | 80.3         | 8, 9                    |
| 3 $\alpha$           | 1.12 (1H, dd, <i>J</i> =14.4, 4.2)        | 36.9         | 5 $\alpha$ , 6 $\alpha$ |
| 3 $\beta$            | 2.51 (1H, ddd, <i>J</i> =14.4, 9.6, 3.6)  |              | 9                       |
| 4                    | 1.74 (1H, t, <i>J</i> =4.2)               | 45.0         |                         |
| 5 $\alpha$           | 1.32 (1H, ddd, <i>J</i> =14.4, 9.6, 4.2)  | 28.1         | 3 $\alpha$              |
| 5 $\beta$            | 1.80 (1H, ddt, <i>J</i> =14.4, 10.8, 4.2) |              | 10                      |
| 6 $\alpha$           | 1.40 (1H, ddd, <i>J</i> =12.6, 9.6, 4.2)  | 27.4         | 3 $\alpha$              |
| 6 $\beta$            | 2.11 (1H, ddd, <i>J</i> =12.6, 10.8, 4.2) |              | 8, 10                   |
| 7                    |                                           | 47.8         |                         |
| 8                    | 0.91 (3H, br. s)                          | 13.6         | 2, 6 $\beta$ , 9        |
| 9                    | 0.92 (3H, br. s)                          | 19.7         | 2, 3 $\beta$ , 8        |
| 10                   | 0.97 (3H, br. s)                          | 18.9         | 5 $\beta$ , 6 $\beta$   |
| 1'                   |                                           | 166.6        |                         |
| 2'                   |                                           | 123.1        |                         |
| 3'                   | 7.60 (1H, d, <i>J</i> =1.8)               | 111.7        | 4'-CH <sub>3</sub> O    |
| 4'                   |                                           | 146.2        |                         |
| 5'                   |                                           | 149.8        |                         |
| 6'                   | 6.96 (1H, d, <i>J</i> =8.4)               | 113.9        |                         |
| 7'                   | 7.64 (1H, dd, <i>J</i> =8.4, 1.8)         | 123.9        |                         |
| 4'-CH <sub>3</sub> O | 3.95 (3H, br. s)                          | 56.1         | 3'                      |
| 5'-OH                | 6.02 (1H, br. s)                          |              |                         |

19. Table S2. <sup>1</sup>H NMR, <sup>13</sup>C NMR, and NOESY spectral data of compound **2** (CDCl<sub>3</sub>) (<sup>1</sup>H: 300 MHz, <sup>13</sup>C: 75 MHz,  $\delta$ : ppm,  $J$ : Hz)

| Position             | $\delta$ (H) ( $J$ in Hz)           | $\delta$ (C) | NOESY                   |
|----------------------|-------------------------------------|--------------|-------------------------|
| 1                    |                                     | 49.0         |                         |
| 2                    | 4.89 (1H, dd, $J=6.6, 4.2$ )        | 81.3         | 3 $\alpha$ , 6 $\alpha$ |
| 3 $\alpha$           | 1.91 (1H, dd, $J=13.2, 6.6$ )       | 38.9         | 2, 5 $\alpha$           |
| 3 $\beta$            | 1.93 (1H, dt, $J=13.2, 4.2$ )       |              | 9                       |
| 4                    | 1.76 (1H, br t, $J=4.2$ )           | 45.1         |                         |
| 5 $\alpha$           | 1.27 (1H, ddd, $J=14.4, 9.6, 4.2$ ) | 27.1         | 3 $\alpha$              |
| 5 $\beta$            | 1.80 (1H, dq, $J=14.4, 4.2$ )       |              | 10                      |
| 6 $\alpha$           | 1.16 (1H, ddd, $J=12.6, 9.6, 4.2$ ) | 33.7         | 2                       |
| 6 $\beta$            | 1.60 (1H, td, $J=12.6, 4.2$ )       |              | 8, 10                   |
| 7                    |                                     | 47.0         |                         |
| 8                    | 0.91 (3H, br s)                     | 11.6         | 6 $\beta$ , 9           |
| 9                    | 0.88 (3H, br s)                     | 20.0         | 3 $\beta$ , 8, 3'       |
| 10                   | 1.12 (3H, br s)                     | 20.1         | 5 $\beta$ , 6 $\beta$   |
| 1'                   |                                     | 165.8        |                         |
| 2'                   |                                     | 123.1        |                         |
| 3'                   | 7.55 (1H, br s)                     | 111.8        | 9, 4'-CH <sub>3</sub> O |
| 4'                   |                                     | 146.2        |                         |
| 5'                   |                                     | 149.8        |                         |
| 6'                   | 6.93 (1H, d, $J=8.4$ )              | 114.1        |                         |
| 7'                   | 7.59 (1H, br d, $J=8.4$ )           | 123.9        |                         |
| 4'-CH <sub>3</sub> O | 3.93 (3H, s)                        | 56.0         | 3'                      |
| 5'-OH                | 6.08 (1H, br s)                     |              |                         |

Table S3. Relative free energies and populations of the conformations of **1** and **2**.

| Conf.     | DFT/B3LYP/TZVP |                 | DFT/B3LYP/cc-pVDZ |                 |
|-----------|----------------|-----------------|-------------------|-----------------|
|           | $\Delta G^a$   | P% <sup>b</sup> | $\Delta G^a$      | P% <sup>b</sup> |
| <b>1a</b> | 0              | 80              | 0                 | 74.7            |
| <b>1b</b> | 0.86           | 12.8            | 0.55              | 16.3            |
| <b>1c</b> | 1.02           | 7.2             | 0.62              | 9.0             |
| <b>2a</b> | 0              | 86.2            | 0                 | 57.4            |
| <b>2b</b> | 0.93           | 7               | 0.58              | 22.5            |
| <b>2c</b> | 1.06           | 6.8             | 1.05              | 20.1            |

<sup>a</sup>The unit for  $\Delta G$  is kcal mol<sup>-1</sup>.

<sup>b</sup>Populations based on  $\Delta G$  values.
